# Supplementary material for: Identification of prognostic and therapeutic biomarkers in type 2 papillary renal cell carcinoma
Source: World J Surg Oncol. 2023 Mar 16;21:98. doi: 10.1186/s12957-022-02836-3 (PMC10022194; doi:10.1186/s12957-022-02836-3)
Supplement: Supplementary file 1 — Additional file 1: Table S1. Down-regulated and up-regulated differentially expressed genes in three cohorts. [file 12957_2022_2836_MOESM1_ESM.xlsx]

## Sheet: down-regulated
Table S1. Down-regulated and up-regulated differentially expressed genes in three cohorts
TCGA	GSE48352	GSE26574	TCGA|GSE48352	TCGA|GSE26574	GSE48352|GSE26574	TCGA|GSE48352|GSE26574
43900	GALNTL2	SOSTDC1	FBXL3	AKIRIN1	TMEM178	CLMN
44078	MAP1LC3A	LOC644090	CDH3	SELENBP1	PTN	ALDH4A1
44080	ST14	LRRC19	IL1R2	TMEM38B	MFSD4	HEPACAM2
LGR6	FAM102A	LOC440335	RAPH1	HMGCS2	SPRY2	IRX2
CCBE1	MACF1	PHYHD1	HOXD1	IL13RA2	C4orf31	FGF1
COL28A1	SPRY4	NA	TMEM204	ELF5	C8orf4	MOXD1
ETNK2	COL12A1	EDNRB	SIM2	LRRC32	AGPAT9	SLC26A4
SLC34A3	TENC1	GABARAPL1	PDZD2	FBP1	GPR116	HAO2
HACE1	C11orf61	PRKD1	PPP1R16B	FOLH1	TMEM50B	MEIS2
SREBF2	SASH1	ISCA1	FAM167A	HADH	TLE2	AQP6
NEXMIF	DDX17	HIBCH	FAM167B	ACADM	DSTN	IGFBP2
CBLN2	PPAPDC1A	CLN5	CHODL	MGAM	C9orf3	ATP6V0D2
SLIT3	ZNF662	VPS37B	PELI2	NRN1	C12orf59	NEDD4L
CYP2E1	HOXB3	TMEM59	MYLK	TREH	RGL3	S1PR1
TM4SF5	NFAT5	C9orf5	MYO5C	C9orf66	C7orf41	CAMK2N1
RAB11FIP4	CELF6	C11orf52	ADD3	DCXR	DDAH1	KLHL14
SIK1B	LOC146336	CRYL1	EMILIN1	GLYATL1	C1orf168	TMEM207
EPM2A	WFDC2	FOXC1	ADAMTS5	SLC22A8	MST1	CUBN
C9orf84	TP53I3	PRR15L	NR4A1	CADPS2	SLC22A6	RHOBTB3
CRISP2	NCRNA00185	TMEM158	AOC3	GADD45B	VAV3	CYYR1
LIN52	SATB1	SYNJ2BP	SYNE1	CYB5A	ABP1	REN
JAM3	KCTD6	RBP1	CRYBG3	HS6ST2	H19	CCDC3
FOXI2	ENPEP	AUH	SYNPO2	SLC23A3	ATP1B3	HOXD4
NTF3	LHFP	PECI	SEC14L1	SLC7A8	ST3GAL6	LDB2
ESPN	MT2A	GADD45A	AFAP1L2	PLS3	SLC20A2	ARG2
GLIPR1L2	ACTA2	CDC37L1	TMPRSS4	TMEM125	C17orf91	FGFR3
HMCN1	BGN	DNAJC19	LUM	NEDD9	PRSS8	ENG
IL11	CDH11	HDHD3	MYH11	ITPR1	CRYAA	XPNPEP2
SYT7	MYL9	SHROOM3	PLEKHG1	RBP7	DEPDC6	CEACAM1
SVEP1	EDN1	ACAT1	SLC4A9	FRZB	GALNTL4	DACH1
PPP1R14A	COL16A1	HIGD1A	NEBL	LPL	BEX4	IER2
SCN7A	COL15A1	BAG1	HSPG2	FCN3	ACAD8	CMTM4
SNED1		SHISA2	EGFL7	GLTP	BCR	RASD1
LSAMP		GOLM1	CDH13	MIOX	PPAP2A	KNG1
OSBPL6		PROM1	SCN2A	ABAT	LOC375295	S100A2
SLC25A42		KRT7	TACSTD2	SNURF	ACAA1	PLVAP
WDFY2		SALL1	HPCAL4	PEPD	CRIP2	WDR72
SUSD5		CD59	EBF1	FOS	YAP1	EMP1
TNMD		CTSH	HOXD3	ERG	FAM108C1	HOXD9
SLC5A11		PAPPA	NPHS1	PNP	C4orf32	KIT
NOS3		LMBRD1	CD93	CDH1	NOSTRIN	DNASE1L3
FMO5		CISH	CPAMD8	EPHX2	CIT	TFCP2L1
FAM180A		MED21	PEG3	GIPC2	SPINT1	RASL11B
TACR1		TMC4	TNS1	MT1H	KIF12	TIMP3
RTL5		GNAI1	PEAR1	GATM	LOC643008	ITGA8
PRODH		DNAJA1	SHANK3	CHGB	MT1M	MUC20
ABCG2		CLDN7	PDGFRB	IER3	SLC44A2	ESAM
SLC13A2		ZNF295	CBX7	ANK2	ETS2	HOXD10
INSYN1		RNF183		PANK1	CRISPLD2	CGNL1
PGR		ADI1		UAP1	SLIT2	FAM43A
SHE		RDH10		KHK	MYO6	GHR
PLA2G4F		C14orf4		SGMS1	KLF2	THY1
ZNF835		HES1		SNRPN	RAB17	APOLD1
CFTR		SPIN1		MYH10	MOSC2	DUSP9
ARFGEF3		ISOC1		ARNT2	ZNF204P	MGP
RBP2		ZNRF3		ERRFI1	TNC	FXYD1
CAVIN2		ZSCAN18		IQGAP2	ITGB6	C11orf96
FAM43B		ABCA8		AGMAT	SERPINI1	RALYL
DNMT3L		ECHS1		PFKFB3	LPPR1	ST6GAL1
CTSV		CYP1B1		DBT	C19orf77	COBLL1
CFHR1		COX7A1		FRAS1	WFDC1	MAN1C1
ADH6		ESRP2		ACSF2	PAX2	AQP3
FGL2		CCNG2		RALGPS1	ANKRD57	CA12
RGS6		ANKRD43		NAP1L5	MT1X	PECAM1
ZNF676		FLJ22763		FTCD	C5orf23	RAPGEF3
GRAP		HIST2H2BE		AOX1		MECOM
EGR1		SLC22A2		HMGCR		STC1
ZDHHC14		SLC44A4		FZD7		GSTM3
KRT6A		CPVL		PRMT6		MAL
PCDH18		ARRDC4		ARHGAP18		SPTBN2
ZNF883		NAT8B		ANGPTL3		TFAP2B
FRMD1		CNN3		C16orf89		CA4
MELTF		ADAMTS1		UPP2		TMPRSS2
WNT8B		SEPP1		DUSP1		LIMCH1
INSRR		NAT8		ACO1		GPC5
NRG4		OXCT1		AUTS2		BTNL9
CITED1		KLHL13		TYRP1		TBC1D4
NR4A3		PPAP2B		PSAT1		SUSD2
PAQR7		ANXA3		CYP4A11		TAGLN
MYOC		BRP44L		AFM		SEMA3G
FRMD3		ID4		TOX3		SLC34A1
MUC6		BBOX1		PCK2		ATP6V1C2
ZNF552		ACADL		KCTD1		SPINK1
HTR1B		TST		CD9		PLN
PLA2R1		SERINC1		PRSS23		ECM2
GDF7		KIAA1737		ADAMTSL2		PRKCQ
RNF212B		RHOB		CTXN3		ACY1
STUM		KCNK5		GATA2		PCK1
MAGI2		PHYH		CXCL12		ARHGAP24
USP46		PCCA		ECHDC3		MFAP4
ANGPTL1		ZFP3		F11		CYFIP2
GJB1		C6orf155		TCEAL2		NTN4
GAS2		AQP1		C11orf54		SPRY1
OIT3		ID1		G6PC		NPNT
KCNK10		FAM36A		GRB14		CRHBP
TCF4		NIPSNAP3A		GSTA1		COL4A4
CNTFR		PTGR1		SH3BGRL2		ATP6V1A
C8orf88		HYAL1		DSP		HRG
CCM2L		RBP4		LMO2		ATP6V1G3
MYZAP		EFNB2		SLC22A7		CTGF
CCDC181		KCNJ15		EPCAM		SNAI2
LZTS3		FOLR1		DUSP6		BSPRY
SNHG28		CPE		IGF2		ERP27
MRLN		ZFP36		ALB		WT1
PLPP1		AKAP12		PALM		GPC3
TRIM50		PXMP2		IRS1		FBXO21
SMIM5		PPP1R1A		A1CF		TMEM30B
AVPR1A		ENPP2		PCYOX1		TSPAN8
PNOC		MT1E		LAMC3		KLF9
TMPRSS3		HSPA1A		SLC7A13		SHISA3
MPDZ		ASPA		IDI1		UMOD
SULT1B1		ACSL1		FECH		DPEP1
CACHD1		ECHDC2		DIO1		ADH1B
CES3		TM4SF1		MSRA		RHCG
B4GALNT3		AKR7A3		DAO		TGFBR3
EMP2		ANPEP		GPX3		GABRA2
SCN2B		PLLP		SLC25A4		SOCS2
DNMBP		FUT6		UPB1		PODXL
OR2T10		SLC16A9		ACADSB		AQP2
MRC1		TPM4		DDC		TCF21
RAET1G		C13orf15		TCEAL7		FOXI1
SCTR		FAM107B		NPR3		CLDN16
SLC4A8		RHOA				TSPAN7
SYT1						STAP1
SYT9						SH3YL1
TIMP4						GRHL2
CREM						MT1F
ATP6V1G2						BEX5
KLK1						ERMP1
HS6ST3						DYNLT3
ODAM						TCF7L1
CRB2						MUC1
KL						TBX2
CTIF						FAM107A
NDNF						KCNJ10
PDE1A						PTH1R
SOWAHA						CTNNAL1
PDE3A						PTGER3
CLC						KIF13B
THSD7B						TBC1D9
GSTA2						RAB25
ASPG						CLEC3B
MAB21L4						HTR2B
FAM83B						AK3
MSI1						IRF6
SLC16A11						ATP6V1B1
MAGI3						GGT5
FHL5						CGN
SMIM10L2B						SYTL4
CLEC1A						TMEM61
GRIA3						SLC22A12
EYA4						EGF
BVES						PLAU
IGFBP1						FXYD4
LONRF2						PVALB
C1orf115						LTBP1
NRIP2						DNER
DNAH10						AZGP1
CLEC14A						TRIB2
DPP6						FGF9
USP2						SCNN1G
LGI2						HSD11B2
RNF223						GNA14
FAM171A1						SERPINA5
EPHB3						IRX1
BCL2L10						PBLD
TPPP3						GALNT3
FAM184B						SCNN1A
BLOC1S5-TXNDC5						PLG
PLPP3						NELL1
DEPDC1B						CSRP1
AKAP2						AGTR1
SLC6A18						CALB1
MYLK3						APCDD1
SUSD3						SLC25A33
PNPLA1						SCNN1B
ART4						SH3BP4
VGLL3						RNF150
ACKR2						CDH5
DHH						HEPH
WNT6						SLC12A3
HRC						FAM151A
SLC9A2						SLC14A1
ADH1C						ITGA2
GABRB2						CLDN8
ARHGEF26						PIPOX
PBX1						WNK4
GABRP						ACPP
MGAT4A						GMPR
KIAA0040						PARM1
ARHGAP20						LRRC2
CNNM2						CLDN19
PCDH17						RCAN1
SCD5						TGFBR2
KLRG2						KDR
NR5A2						EHF
PTGS2						SLCO2A1
TMEM88						ATP1A1
APBB2						MT1G
PLCB1						LIPG
MS4A10						TMEM213
XK						MPPED2
VSIG2						PLSCR4
PROZ						NPY1R
PRMT9						FERMT2
GLTPD2						TIE1
KIF26A						RERGL
TMEM132C						BHMT
GGACT						PLCG2
BRINP3						CEL
CDC20B						PALM3
DENND2A						RNASE1
WNK1						CLIC5
CYP1A1						CSRNP1
BNIPL						ALDOB
FAIM2						CYR61
TBX3						SH3BP5
PHF21B						FBLN5
TNS4						AIF1L
ISM2						PAH
MTURN						SGIP1
ARHGEF15						HPGD
RASSF9						ESRP1
FLT1						BMP6
BPI						PLAT
RGCC						FAM3B
ZNF710						UGT8
FAM234B						LCN12
PFKFB1						GATA3
FRG2C						SMARCA2
SVOPL						WLS
ZNF503						PTPRO
ZNF521						GCH1
CNKSR1						NCOA7
AGXT2						EHD3
SGCA						ASAP2
PCOLCE2						IGFBP5
KMO						CLDN10
SLC36A2						PLA2G4A
CCDC88C						TRIL
ACOT11						ANGPT1
FOXA3						DCN
ACOT6						NPHS2
ARHGAP6						CAT
NRK						DMRT2
CAMK4						CADM1
HIF3A						A2M
TMPRSS13						SETBP1
ARHGAP23						EMCN
ADTRP						ALDH6A1
KCNG2						NOX4
MRVI1						MRPS6
NYNRIN						PDE2A
DIO2						EPAS1
CALML3						KCNJ1
H1F0						SLC16A5
RET						ENPP6
RANBP2						COL9A2
IL1RL1						PTGER4
GRAMD1B						TP53INP2
DDR2						OLFM4
CYP27B1						PTPRB
IDH2						SLC13A3
ZNF366						GP2
SEMA6D						SUCNR1
MYOM2						EFHD1
NAALAD2						SPOCK2
GPR17						GGT6
ZNF704						PRR15
LAMB4						MME
TP53AIP1						C2orf40
GPR182						MEIS1
TFAP2A						PAQR5
OVOL1						FREM1
SNCAIP						BCAM
NEU4						COL4A3
ZNF781						SOST
F2R						HPD
ANKRD46						PDK4
SNX18						RAMP3
SLC14A2						GPM6B
C1QTNF2						BDKRB2
UNCX						ATP6V0A4
HACD3						FABP1
TMEM178A						EFEMP1
TNNI1						MAN1A1
REM1						ESRRG
UGT2A1						STON1
PDLIM2						RAP1GAP
BMPR1B						TMEM45B
DDN						CDKN1C
NCKAP5						NDRG2
ATP1B2						SLC5A3
MOGAT2						F3
ZNF677						S1PR3
ACOX2						PDGFRA
FLRT1						C7
TCF24						LNX1
PDE10A						FRY
PCDH1						HSPA2
CBARP						GRAMD1C
LINGO2						SLC26A7
CYP17A1						ITM2C
TBXA2R						NR3C2
SELENOP						CSGALNACT1
PRKN						SFRP1
DDX3Y						MUC15
CPED1						ASS1
VAT1L						ST6GALNAC3
AATK						VTCN1
CCL11						CDC42EP3
SEMA4A						PLCL1
SPRR2A						PDE8B
KIAA1191						HOXB6
USP53						CLCNKB
SORCS2						TRIM2
NR1I3
PKLR
HECW1
ADGRL4
FAM13C
SOWAHB
EFS
SARDH
SIGLEC11
GJA4
BCL6B
DLG2
WNT7B
ITPR2
GDPD2
LIMS2
GPIHBP1
CYP8B1
PARD6G
HPSE2
INPP4B
PINLYP
SP5
ADGRL3
SCUBE3
MYCT1
HS6ST1
SYNE3
SLC4A11
SFXN2
FOXF1
NHSL2
OLFML3
VWA2
TMEM105
SELE
NOS2
TENT5C
TMEM255B
GSTM5
ENPP7
IVNS1ABP
PTPN21
USP44
MTTP
TFAP2C
HAS2
LRRC52
COL4A5
CNTN1
AC005020.2
TRPC4
NEURL1
SAMD11
VIPR1
ARHGEF3
ADAMTS8
KANK3
STRA6
EDN2
SEMG2
RNF24
HECW2
HSPB3
LIPH
MPP7
SIX4
SORD
TPD52
B4GALNT2
AGXT
USHBP1
DEFB1
DPT
UBE2QL1
SLC7A1
POU3F4
LPCAT2
TOX
APOM
DNAJC11
SLC16A12
SYT6
LRRN2
C5orf67
GUCA1C
C2orf72
EXOC3L1
SLC9A3
GPR4
SLC43A2
CACNA1H
PRODH2
SLC9A3R2
SERPINA4
TMEM25
SYP
ECEL1
FAM222A
PCDH9
ZNF483
ZNF154
DNASE1
AOC1
MYMX
ALPL
EFCC1
SLC4A1
DBH
CDC42EP2
RGS16
GNG8
CAPN14
SPAAR
THBS1
ADGRD1
ZNF418
NLRP2
C4orf54
NALCN
SLC16A2
LEFTY2
CPT1C
PID1
CR1
NTNG1
SLC43A1
KCNE1
CAND2
KCNAB1
GPR3
SERTAD1
IRF2BPL
C3orf85
PIK3C2A
GK
SELENOM
SLC25A34
VSIG8
KCTD15
AC009336.2
HIP1
TBL1Y
GPM6A
SLC25A25
THSD1
KRT4
RDH8
EFCAB14
APOH
FOLR3
PON3
MANEA
SLC28A2
TTPA
HCAR1
AMPH
TANC1
KDM5D
C2CD4B
JHY
GCGR
SPARCL1
ZNF233
KSR2
AGBL4
TNS2
ZNF878
NEURL1B
NTRK3
CLEC18C
STARD8
MEDAG
MBOAT1
MOCS1
PPM1K
RNF152
CKM
FAM89A
OVCH2
COL9A3
CPEB4
GYPA
KDF1
MUC13
MAGEH1
AC005726.1
HSPA12B
DWORF
C5orf38
ZSCAN1
NUAK2
FUT2
KHDRBS2
TMEM266
ROBO2
GAD1
SFTPA2
SNX25
MEOX1
LIPM
SLC15A2
ADGRA1
CRIM1
FAT4
ATP12A
CNGA1
HGF
RASGRF2
BTC
NWD1
EDDM3A
MFSD6L
THRB
THSD7A
PTPN13
SLC2A12
ACAD11
RIMBP2
MAP3K15
PROM2
ALAD
SHC3
PRX
CFAP45
SIAH3
MGAT5
ITGA9
B3GALT2
ACOT12
GALNT18
NOVA2
REEP6
IQSEC3
DLGAP2
AK4
MTNR1A
TRAM1L1
GRIK5
NXPH2
OGN
CCDC121
MOB1B
GABRB3
WWC2
NRGN
VEPH1
TESMIN
ZFY
FAM24B
NRARP
TDGF1
NAGS
FOXD2
SH3TC1
PPP1R36
CCL21
CFAP73
MAP4K3
SHISA6
DUSP2
LMO1
SYDE2
SERPINC1
ERVMER34-1
SNAI1
KCNJ3
SELP
LIX1
RTL4
EMX1
C14orf132
SOX13
ARHGAP28
PTPN4
UNC5B
DUSP26
CAPN8
PRR35
CD34
PAMR1
NPY5R
SSBP3
EDNRA
MPP5
TNNC1
IL17B
ASB5
NTN1
AC112229.3
TRPV4
FAM181B
C1QTNF7
DTX1
NECTIN4
NR0B2
CYP26B1
JAM2
SIDT1
UGT1A9
ANKRD65
POU2F3
FGF18
FAM198B
SCUBE1
LHX1
APOC3
WASF3
PLCXD3
ZNF488
CPXM1
INKA2
MFAP2
SYK
ST8SIA6
OAT
CGA
CDH9
AMER1
FSTL4
MAGI1
TLN2
KAT2B
SH3GL3
JPH4
RORB
FMO3
SLC52A3
PKP1
ZNF433
KLHL32
ZNF778
WEE1
TOMM20L
EGR2
DLX3
FOXO1
LPA
C5AR2
NUDT10
SLC25A15
ABHD17C
ADAMTSL3
RIPOR3
INSYN2B
MGAT3
OLIG1
CALCRL
CHAC1
RASSF10
APOD
TRIP11
LYPD6B
COL26A1
FGD5
S100A5
CD302
PIP5K1B
DACT1
CACNB4
ANXA9
TRARG1
MAFF
PTGFR
NANOS1
DEPTOR
ADIPOQ
RGS7BP
KBTBD12
KIAA1549L
SPRR1A
ZBTB21
PHACTR1
TOM1L2
IBA57
IL33
ARAP3
GAL3ST3
NAP1L2
RHBG
ARID3A
NAT8L
AARD
PINK1
P2RY2
SLC5A4
CA2
ACSBG2
NUAK1
SLC6A19
AMN1
PCDH12
PIGH
CORIN
ZNF157
FRMD7
HOXD8
SHBG
CASR
LSMEM2
TNS3
GPT
C6orf223
CNDP1
RIOX2
WNT9B
TRPC6
SH2D3C
LGSN
GIPC3
PITPNM3
ZNF649
ARID5B
GIMAP8
MYMK
RPRM
LYVE1
NAALADL2
GSTT2B
IGF1
CR2
CPNE6
LDB3
OVOL2
BCOR
ACOT4
ADRA2C
PRKAR2B
PKNOX2
KCNK13
GJA5
NR4A2
SLC16A7
TMIGD1
ARL4D
KNL1
C10orf82
ACSL4
DLGAP3
EIF1AY
LDHC
MNS1
FAM110D
LBP
CLEC18B
SLC45A1
CASTOR1
PDE4B
ASB15
FER1L6
ROBO4
RPS6KA6
TBC1D30
ABCA9
EGFL6
MATN2
ACACB
TMEM52B
CAPS
GPRC6A
KRT14
CDKN2AIP
WSCD2
LAMA2
CCDC152
GIMAP1
FYB2
RNF224
PROX1
KIRREL2
TSPAN5
VWA5B1
GNG7
ESRRB
MAP3K21
BRPF3
KCNIP1
POLN
PSG5
TMSB4Y
LEF1
SLC26A9
ZNF804B
OTOGL
C3orf70
DOK6
ADRA2A
TMSB15A
TENT5B
HELT
APLNR
BCAS1
STX19
CPEB3
AQP5
CASQ2
SFTPB
SLC7A9
TGFB2
DCPS
GPRC5B
PRPS2
CYP4F2
MYOCD
PDE4C
NUDT4
CALHM5
SIM1
APCDD1L
MAPK4
PYGM
CYP3A4
GFRA2
FBLN1
APLN
BAHCC1
LRRC10B
FXYD3
COL25A1
PHGDH
CH25H
CHD5
TMEM174
ACTRT3
NTRK1
CD82
GRIK2
ZNF518B
TFF3
CSF3
KLHL15
CYP4F3
ANO2
RAPGEF4
MCF2
PRXL2A
CCSER1
ZFP92
PTX3
SYNDIG1
HEY1
C1orf226
TTR
WISP1
ITLN1
EPN3
SPRR3
LARGE2
LRIT3
CIPC
LTK
P2RY14
FABP4
CRYAA2
SLC7A7
IGFALS
SOX5
PTGS1
CCDC160
MEOX2
CALCR
SMOC1
CRABP1
PC
PM20D1
PRDM16
CDH16
TGM1
COL4A6
AMFR
RXFP1
EMID1
ENOX1
DDX25
C2orf88
FUT1
OXGR1
BLNK
WNT10A
ABCC9
CA10
INMT
KCNN3
TDRD5
FAM184A
TBC1D24
RAET1E
EGR3
PDGFB
EDARADD
ATP1B1
LEPR
RASSF8
C14orf180
VIL1
EXPH5
FAHD2B
TMEM238L
GLOD5
VGLL1
GDF3
BOC
CPN2
PXDNL
ADCY4
SRGAP2C
SOWAHC
IGSF11
KCNMB2
CST9
SLC22A23
INSC
HOXB5
PLXNA4
CYP4X1
AVPR2
PFN3
TNXB
SSTR2
SOX18
SUSD4
CYP2B6
PTCH1
DAAM2
CYP39A1
ARSF
DLL4
ZNF804A
LMOD1
TESK2
RAMP2
FBLN2
TPST2
HEG1
HSPA12A
FBXL22
SGSM1
ASPHD2
LMX1B
PGAP1
STOX1
GRIN2A
CXorf36
MMRN1
RASIP1
DHDH
SLC22A1
LMO3
PLEKHD1
SLC25A47
HS3ST3B1
PRKCE
SPTB
ADAMTS4
KLHL3
TMEM150C
TSHZ3
JUNB
ZNF582
MN1
LHFPL6
FGF7
GPBAR1
TSPYL5
HS3ST6
CCL19
MPP2
DCHS1
AASS
TMEM86A
SP4
ARL15
GIMAP6
GREM2
ADRA1D
EPX
CDC14A
SYN2
TBC1D1
SLC5A12
DUSP15
TFF1
PDZRN4
ADAM22
RFTN2
INPP5J
RHOJ
VDR
FAM83F
SHCBP1
FNDC5
PLEKHG4B
SGPP1
PRSS22
PLCH2
ADAMTSL1
LTBP4
HCAR2
SIK1
DMGDH
DLC1
PAQR8
SLC6A17
CD300LG
RNF43
CA8
LRRC55
THBD
KIF5A
GPR146
LYPD6
GALNT15
AP1M2
ZYG11A
FAM169A
ZCWPW2
ZFYVE9
FAM198A
HSD11B1
ABCD2
TMEM35A
FMN2
ZNF423
DEGS2
LAD1
KCNC4
USP9Y
ITGA10
FMO4
CLUL1
GREM1
TPPP2
HSPB6
SLC30A2
BTG2
NOTCH4
EAF2
RRH
PGM5
ZDHHC2
CCL14
RASL10B
NUGGC
EPO
ZNF331
SYNPO
ADRB1
SOX7
SALL3
CTH
CHP2
RAB3A
KLHL33
CDA
TEK
PRELP
ITIH5
CLDN5
UTY
HSPB7
FBN3
SLC29A2
SLC5A2
TCIM
SGK2
NCCRP1
TTC36
CCL8
SHPRH
CACNG4
ZBTB16
WNT11
BAALC
SEC14L5
LRCOL1
NTSR1
PNLDC1
UGT3A1
GMNC
USP13
CLMP
GPAT3
NKAPL
DES
DPYS
PSCA
MCCD1
DNAJC16
FLT4
ATF3
AGRP
CPNE5
AC007906.2
TMEM200C
PGPEP1L
ECSCR
SLC38A3
JCAD
NOS1
PDE7B
FAM189A2
HSPB9
ACSL6
RNF186
KCNN2
CDKL1
COL14A1
ZNF728
TMEM106A
UNC5C
KRTAP5-8
MIB1
PCP4L1
PLXNA2
ALDH3B2
IL17RE
LY6L
C3orf52
TRPV6
ZHX1
HMX2
MRO
KRT13
PDE1C
ERICH4
MYCN
ZNF726
TINCR
F13A1
TRPM6
TBC1D14
HFM1
KLHDC8A
AFP
GFOD1
MPC1
ACER2
TMTC1
CACNA1C
ST3GAL4
SLC30A8
RXFP4
EPHX4
LGI4
SHROOM4
LY6K
SPAG5
CKMT2
ADRA2B
SORL1
TACC1
PER3
MFSD4A
FAM69B
OMD
MYOM1
TMEM164
CYP3A7
RFLNB
CHRM3
DGKI
SERINC5
SPHK2
FAT2
MYBPH
CD248
L2HGDH
PI16
CWH43
ADH4
TENM2
NUPR2
NES
CPXM2
BMP5
PIK3C2G
PLPP4
C9orf135
NOS1AP
RANBP3L
PRIMA1
MYO10
PLPPR1
COL13A1
C9
SLC23A1
DACT3
RNF212
PLIN1
ADGRF1
FAM162B
LURAP1
COL24A1
KCNQ1
CD83
CLDN11
PEBP4
RDH12
FLRT2
ALX1
SYTL5
MRAP2
ABCA4
ZNF44
CCDC186
DOCK9
EML6
TTC38
NTS
PNMT
NEGR1
SRARP
SMIM24
EBF2
CPT1A
RXRA
ERBB4
KCNJ12
SOX17
TRPV5
RUNX1T1
GFRA3
RGS5
ABO
MAP6
CCL23
LGR5
BSND
CCDC178
LIPE
ST3GAL1
TAL2
CASZ1
FOSB
N4BP3
PYY
TP53I11
BDKRB1
MT1HL1
C1orf116
MYOZ1
FGFR2
ADAMTS16
ADCY1
LRRN3
CYS1
TRAPPC10
VSTM4
KLK7
GATA5
EGFLAM
SRGAP2B
SCN9A
IQCN
ST8SIA5
CCNI2
MCOLN3
ANKRD35
CLDN20
RNF144A
HS3ST3A1
TKFC
DLL1
PRRG2
SLC12A2
PRSS35
TRPM3
NOTUM
PAPPA2
COLEC11
GPRASP1
KCNH6
IDNK
NOCT
NAV2
CACNA2D2
TMEM52
MRGPRF
KCTD8
ITGA1
SMOC2
SLC16A10
GC
CAMK2A
PLCE1
LYRM7
PRKAA2
CHRDL1
ZNF98
RBBP8NL
GRM1
C10orf55
DNM3
CLNK
SLC12A1
ZNF540
CYP51A1
HOXB9
ADGRF5
IYD
FGD3
MTUS1
TNNT2
LDLRAD4
HBEGF
MYOZ2
CYP4B1
RALBP1
SLC22A13
GPR20
IPCEF1
TAL1
PPM1L
PRLR
CAB39L
MFAP3L
TSPAN2
UTRN
SMAD6
CLCNKA
MEI4
GALNT17
ARMH4
GDNF
CNN1
FOXN1
AL049839.2
ASPN
MYO3B
GIMAP5
LDLRAD2
FOXC2
FXYD6
GRASP
FAM241A
CHRNA4
SSTR1
RGN
ATP1A2
LRRC70
AQP4
ITPKB
NIPAL1
CACNA1E
TLE6
ATP4B
TEF
CLDN14
KCNA5
ADAMTS17
GAS1
OPHN1
NTRK2
SQLE
ZNF385D
NR2F1
LHX6
ADGRV1
SPTSSB
PPP2R2B
GIMAP7
HAO1
MCC
TBC1D13
ATP8B1
RSPO3
SLC6A4
AL845331.2
RGMA
LDLR
SCN3A
SLC8A1
PLA2G12B
GGH
ASB9
GAS6
SFTPD
KIF5C
NYAP1
CYP4A22
NFASC
NBEAL1
PNPLA3
SCARA5
GPR155
ARC
MARVELD2
FAM131B
ADGRF3
ADGRB3
NHLRC4
GCNT4
SPSB4
PPP1R12B
TRMT10A
ANO3
NT5C1A
PADI2
DOC2B
SLC45A4
HMCN2
GJA3
TUBAL3
CCDC8
HOXD11
PCDH7
IGSF9
PALMD
TMEM72
SORCS3
ADGRA2
PTGER1
PTGIR
ZNF460
ASPDH
TYRO3
OPCML
FLG
NKD1
GRIP2
ARHGEF17
UGT2B7
PRKG1
WNK3
MMRN2
KANK4
FAM83D
EPB41L4B
APOL4
CAMK1G
ITM2A
ENTPD3
CALCA
SOX30
C9orf24
LRRC4
SLC9A4
APELA
TOB2
COL19A1
ATP2C2
PACRG

## Sheet: up-regulated
Table S1. Down-regulated and up-regulated differentially expressed genes in three cohorts
TCGA	GSE48352	GSE26574	TCGA|GSE48352	TCGA|GSE26574	GSE48352|GSE26574	TCGA|GSE48352|GSE26574
44077	C12orf32	SHMT2	SDS	CREB5	MANEAL	LMNB1
SIRT7	C20orf46	C17orf62	CENPF	SOD2	KIAA0101	PTTG1
PKD2L1	C16orf75	XPOT	GAL3ST4	RHBDF2	STIL	PNMA2
EDA2R	ORC6L	ST3GAL5	FIGN	RAC2	MAD2L1	TOP2A
HCFC1R1	GLRB	SPNS1	B3GNTL1	CD53	BCMO1	ADCY7
FNDC4	CD3EAP	MAN2B1	SCD	APOBEC3G	SCO2	CDC20
SOX9	LOC401317	NPM1	CD300A	BTN3A2	ADORA3	TTK
CD14	LOC285830	SLC16A1	CHST11	GAS2L3	TUBB4	CENPK
CALHM6		CEP170	NRG1	SLAMF8	FAM26F	ENO2
CCDC78		EPDR1	CENPM	EZH2		RPL22L1
MPG		BAZ1A	CENPH	ABCC3		EIF4EBP1
RASGRP4		MCM5	DLGAP5	FABP6		TMEM163
TTC39A		UCK2	SLC41A2	SLC12A8		HK2
FERMT3		SLC38A6	LST1	APBB1IP		CCNB2
S100A10		TOPBP1	TIMD4	PIR		LY86
SPN		DDX60L	CD86	IGFN1		LAT2
BCL11A		CKAP2	ODF3B	DONSON		F12
ARMH1		LRRC59	TNFSF9	AKR1B10		SPAG4
WNT10B		RACGAP1	FOXM1	P2RY13		TPX2
PSMB3		TMEM22	CDT1	CD2		PRAME
DNA2		STAMBPL1		ISG20		BHLHE41
CHEK2		ZWINT		IGDCC4		TNFSF13B
BRSK1		LEPREL4		HTATIP2		CSTA
TMC8		C2orf82		GPX8		RAD51AP1
CLEC12A		KIAA1598		NME1-NME2		TYMS
PLAUR		ZNF652		LCP2		NOL3
ABCA3		PLXDC2		MS4A6A		CDKN3
CD6		CCDC109B		LACTB2		RRM2
CNFN		MTHFD2		FCGR2B		AURKA
CCDC74A		STK39		LSP1		FDXR
INSL3		TTF2		ANLN		DDB2
KIAA1324		INTS2		CCL4		DTL
SLC34A2		C6orf168		ANKRD29		BUB1B
HIST1H2AI		SLC25A16		PSMB10		CDCA7
CD33		NPM3		DCLK1		ITGAM
LRRC23		TRAF5		LCN2		AHNAK2
PRF1		MAP1B		IDO1		KIF4A
IKBKE		ADAMTSL4		SPSB2		KCNS3
VSTM2L		CX3CR1		FAS		RGS1
BCAN		APOBEC3B		NUPR1		MELK
TMEM121B		UBD		ASNS		IKBIP
TM4SF19		SNX8		SH3PXD2B		RGS10
RTN4R		LOC645638		TKT		GINS2
TNFAIP8		ZNF267		CD48		PGBD5
TPRG1		EIF5A		LHFPL2		KDELC1
KLRC1		SYBU		CXCL13		CCNB1
SLAMF9		TTLL6		C1orf162		CORO1C
ULBP2		FKBP10		NPC1		UBE2C
ST8SIA4		LAMP3		PRC1		TK1
MGST1		ABCA1		FXYD5		TYMP
HIST3H2A		KIF11		PBK		TREM2
ALDH3A1		C1orf38		PLA2G4C		APOC1
LAMA3		MCM2		C15orf48		ASPHD1
MYC		MICB		SPATA20		HAMP
KNDC1		CXCL9		C3		LAIR1
SIGLEC10		ARSE		NNMT		SEZ6L2
BEND6		FAM129A		TYROBP		HMMR
MORN5		TM6SF1		DNMT3B		ALOX5
DAND5		PLAC8		IL32		CKS2
SYTL3		RABGAP1L		SLFN13		TRIP13
SLC27A3				PYCARD		TPK1
TCHH				TAP1		UBE2T
TMIGD3				PLK2		CEBPA
ABHD11				LAPTM5		SCARB1
UBASH3B				ARL4C		NUSAP1
CDKN1A				DOCK2
MVP				NLGN1
CXCR3				SASH3
C7orf57				IFI30
LRRC20				SFN
CTSD				RCN1
PAQR9				BCL2A1
RELT				NCKAP1L
GPR45				GBP5
CCL4L2				MYO1F
PGLS				CD68
IL4I1				EEF1A2
EXOSC5				FCER1G
TLDC1				FKBP11
SLC17A9				ITGB2
ADORA1				DRAM1
C3orf67				RFC4
C10orf99				CD52
FBXL19				AKR1C1
ABRACL				PLA1A
HAS3				TNFAIP6
IL12RB1				HSPB8
ARL11				TNIK
CTLA4				MYBL1
BIN1				IGSF6
CXCR4				IL10RA
HAVCR2				PRUNE2
FAM78A				CEP55
PIP				CD37
DISP2				SACS
C19orf48				G6PD
CEBPB				EVI2B
ADA				RAB38
CENPU				RAB42
EPOP				CYP2C9
TRIB3				ME1
ZACN				AKR1C3
HCLS1				CAV2
PDF				HCK
CLEC5A				ADAP2
RAB26				EVI2A
SNX20				CCL5
SULF2				CD8A
SLC12A5				JAZF1
SP140				GBP2
RPL27				CDH17
KLHL31				IL2RG
EMP3				SNX10
CARD14				CHST13
SERPINH1				CORO1A
TRADD				C1QC
PSORS1C1				NME1
DOC2A				PSMB8
ZNF683				APOC2
HOXA1				PLA2G7
CLEC4A				FMNL2
KRT86				CCR5
ALDH1A1				LY96
ELFN2				DNM1
TDRD6				CTSS
JAML				METTL7B
UNC5A				RNASET2
TRIM16L				PSMB9
SAA2-SAA4				GPR143
TSNAXIP1				KIF20A
CCNE2				TXNRD1
LDLRAD3				GPR183
RARRES3				PTRH2
HLA-F				HTRA4
GM2A
CABYR
RAB32
CRTAM
PNCK
MESP2
LILRB2
CHRNA5
IRX3
UBASH3A
BEST3
AGBL2
SIRPB2
TMEM176A
SLC37A2
TFPI2
DLL3
ZNF474
KIAA0319
JSRP1
TFR2
ZNF385B
NPIPB4
GAREM2
ADAM8
FRMD5
RGS19
UGCG
RRAD
LILRA6
BRCA1
TRIM9
TTC25
OSCAR
DNAI1
P2RX5
SYT12
CD163
KIF14
SIRPG
SLC35F6
AC120114.4
HPX
XKR4
TFPI
ARID3C
SLC15A4
PKIB
ADAM28
CFD
CHRNB2
RAD54L
HLA-A
CDKN2C
TRAPPC1
LBX2
QRFPR
DDX11
KNTC1
TLL2
GJB4
MADCAM1
CDK5R2
PHLDA3
HPCA
ZNF385A
AXIN1
UCN
COL8A2
CDH2
TESC
NBL1
TRPA1
DNAAF1
SOX8
CLU
MSX2
ARHGAP9
HSPA6
CD74
TMEM270
NFKBIZ
MROH6
CD151
ARMC12
FMNL1
MICALL2
TMEM44
CYP3A5
SNX32
SEMA6A
SAP30
APOL1
ARPC1B
CASP1
PPP1R14C
PERM1
GMIP
RHPN1
PLOD3
KLHL6
METTL26
GPRIN1
MATK
FAM111B
LRRC36
SHISAL2A
STMN3
SPINK13
TRIM74
BIRC3
SHH
AMACR
THOC6
C19orf38
SYT14
ITGB8
C5orf49
ITGB4
CARD16
GDA
GRIN3B
RAD51
CARD9
PLA2G16
CD300LB
FAM189A1
DUSP23
NUMBL
RAB6B
CDCA5
CXCL5
SELPLG
FABP5
SCG3
SKA3
RHBDL2
LPCAT1
DGKA
LRRC46
SIGLEC9
KRT8
HMGA2
TMEM98
GTSF1
IKZF3
TMEM159
ROMO1
KHDC1
LRRK2
DCST2
KCNH8
GPR65
LILRA1
SAA2
C4orf47
TMIGD2
CTSW
RNASE2
PLCD3
CATSPERG
MMP9
ACKR4
WFDC12
FOXD4
RHEX
GLIS1
CHRNA6
DLEU7
PIGR
PCDHB2
FAM234A
PAEP
TRPM8
NKX2-8
ADAMTS14
IFI27
RGS17
NUDT1
GPR150
CRIP3
SNAP25
KRT18
RND3
ARHGAP27
CACNB3
RPS2
FBLN7
CENPE
IL10
HIST1H2AM
CCDC189
MOGAT1
ALK
TICRR
AKR1C4
FCGR1B
AOAH
GRN
NRTN
HLA-G
BRIP1
MLIP
CTSK
C7orf61
DNAJB13
LRRC3
HLA-DPA1
SLC9A9
SAPCD1
PKMYT1
GDF5
TNFSF14
RPL37
IDUA
VMP1
GABRD
SAA4
HIST3H2BB
CPA4
RAD9A
GALNT5
TREM1
CDCA3
NT5DC3
CD96
TRIM22
CERS1
C1orf194
LYG1
SCG2
INHBE
CDHR1
PADI1
GZMM
RHBDF1
FJX1
PKDCC
FHL1
LTB4R2
CCNE1
PIK3AP1
HSPB1
TRABD2B
S100A9
LGI3
DTX2
CNTN6
SLC7A11
TENM1
TACC3
LIPA
DHRS9
NME2
PIK3R6
EME2
WAS
ZMYND15
HHIPL2
NRG3
ANXA2R
RNASEH2A
TP53INP1
ZNF692
PTCRA
RGS20
SCIMP
IGFLR1
PLA2G2D
MTFR2
NR1H4
PLK1
PVRIG
TRIM16
FZD1
MAP3K7CL
AQP9
AMH
RARRES1
CRYGS
PHETA1
NUTF2
MYO1A
AC010616.1
NPTXR
VSIG4
LHB
JPH2
IFFO1
LY9
FBXL16
TMEM171
CCDC136
NRXN2
RNASE6
ASPM
FGD2
MAPK15
C1orf127
TMEM86B
CDC6
TMEM246
TMEM132A
ZDHHC11
SAA1
IFITM10
CD180
RDH5
TP73
CPLX1
SCG5
SLC15A3
RTP4
EREG
PAQR6
MAST1
CLGN
RASSF4
RAP2B
HLA-DQB1
NCF4
CYTH4
TTLL2
PLPP2
OTOA
HRK
MSH5
CAPN12
C9orf116
MPP6
HIST1H2BL
ZG16B
ASGR1
RNF217
TERT
ANXA2
CATSPER1
NXNL2
ARRB2
LGALS3BP
NIPAL4
CA9
BIVM
MS4A4A
WDR38
P2RY12
SIRPB1
KCNJ4
NKX2-2
ALKBH6
PRSS57
C5AR1
ADAMTS2
VAV1
RELL2
KRT36
PRELID3A
SH3RF3
VXN
CLEC2D
RDM1
SPATA12
AC040162.1
CRYBB1
CCDC74B
PHYHIPL
SLC6A20
NABP1
ORAI3
NIT2
GXYLT2
TNFSF8
HTR3A
LGALS1
PDCD1
TIGIT
ARHGAP22
MCUB
CXCL6
KCTD4
PTPN22
TRPM2
SQSTM1
SLC17A2
PLEKHN1
KCNQ3
PDE6B
BLOC1S1-RDH5
GCKR
IFNE
BRCA2
ADCY2
KIFC1
AANAT
KIF18B
NPIPA3
STX1B
TNFAIP8L2
RPL23
SNAI3
LENG9
HAUS7
CPNE7
SH3BGRL3
TGFBI
ADAMDEC1
IFI27L1
PTCHD4
ANXA13
FUT7
OXTR
APOBEC3D
JAK3
VSIG10L
PRSS21
RPL39
FADS3
TNNT1
RNF175
SPOCD1
EFCAB12
CFP
LILRA5
APOBEC3C
CCL3
NPIPB5
MXD3
C8G
TBXAS1
APOBEC3H
PRAM1
IL18
CLDN1
PAQR4
DNAJC5B
SLC9C1
SLC28A3
CDCA8
ACRBP
HAVCR1
FAM173A
UTS2
POLQ
CEACAM4
IBSP
SRRM3
STEAP3
EFNA3
C1QA
CTHRC1
NEFM
SAC3D1
RARRES2
UPK3A
ANO4
UPK3B
KIF15
PSTPIP1
MZT2A
HK3
KRT80
GALNT12
ABCB6
HASPIN
GPC2
CD8B
PLCH1
PIK3R2
OIP5
CXCR6
HLA-DPB1
CNTNAP1
HLA-DQA1
GPR141
CD5L
CAMK2N2
RPL12
ANO9
TMEM221
PRR11
B4GALT5
AKR1B15
LTA
SRSF12
MS4A14
TCN1
MARCO
HLA-DRA
SCGN
TLR2
PYHIN1
TXN
OSGIN1
NCF2
KLRD1
TBC1D10C
CLSPN
OXCT2
BIRC5
ZBP1
LGALS12
PMFBP1
FFAR4
FPR3
C3AR1
SLAMF7
SCX
CNIH2
OLIG3
FCRL6
PLTP
DOCK11
INPP5D
FASLG
AICDA
LAMA1
HIST1H2BH
RIN3
KRT222
RASSF6
NPIPB6
TAS2R19
SPON2
RPL36A
PRAC2
ARRDC2
GPR19
CCKBR
GSDMB
RPL35
ANXA1
FLNC
MCM10
HTR7
NFAM1
PILRA
CD3D
RAB9B
PIMREG
SH3BP1
SIGLEC14
MAP7D3
SEZ6L
PPP1R3G
MSC
GNRH1
CD27
FCHSD1
TEX11
CCDC14
SLC1A4
SMIM29
LTBR
BCHE
MDM2
FBLL1
TLR7
LIMK1
P2RX4
NRM
P3H4
CSF3R
SOWAHD
SLA2
HYDIN
MNX1
NCF1
DCSTAMP
S100A1
TUBB4A
LILRB1
CDCA2
MLKL
EPHA7
CREG2
LILRB3
LGALS9
LRRTM4
VGF
C5orf46
PLPPR5
AURKB
RPS21
SIT1
C1QTNF6
TMEM92
XCL2
SPC24
BCO2
SRCIN1
LRRN4
GLA
CST2
PSORS1C2
DEF6
AR
PJVK
THBS2
VENTX
CCDC154
STAT4
HMOX1
CYBA
WISP2
NEIL3
CLDN3
FCGR3A
PCSK4
BOLA2B
SLC1A3
EBI3
RGS12
KLRK1
RHOH
MYO1G
GZMK
MESP1
CCND2
CARD11
HES6
NKAIN1
SPC25
CD276
ATP8B3
HSD3B7
OAS1
IRF5
HS3ST1
LGALS3
REEP4
SNRPF
TNIP3
RPL36
TNFRSF10C
MMP11
CHIT1
CNPY3
ELOVL2
ACE2
GTSE1
CORO6
HCST
MUC12
DRC7
CXCL16
OMG
AC004754.1
ASIC3
C19orf84
GRIN2D
CKLF
CENPW
FANCA
ORC6
SLITRK5
XRCC2
NME8
SEL1L3
SPI1
E2F8
NUF2
P4HB
GJB5
TROAP
CD200
LYZ
HS3ST2
TBX21
TAS2R5
TMPRSS6
PRSS36
SNX22
ACHE
MASP1
FGR
TNFRSF10B
C9orf92
CPLX2
PIF1
SPHK1
SQOR
TNFRSF18
CSTB
BTK
SLAMF6
ISG15
ALG3
IGLON5
SLC45A2
HLA-DQB2
CARMIL2
PCLAF
DLX4
IL20RB
NR2C2AP
MND1
PLEKHA4
GFI1
CST1
ORC1
AC068580.4
COL27A1
TNNI3
KRT81
ZAP70
C1RL
MSR1
SERPINA1
GPNMB
POLR2J
CKAP2L
CD72
GZMA
HIST1H4J
KIAA0930
FCGR1A
SCN1B
TSPAN10
MILR1
PFKFB4
ITGAX
APBA2
ARHGAP45
CAMP
SIGLEC7
GDAP1L1
WNT5A
E2F1
GNA15
FAM155B
UNC13D
TNFRSF12A
RIBC2
OASL
STRA8
SYCE1L
UHRF1
CRACR2A
CD22
KCNH2
ZNF771
POLG2
ITPKA
NME9
RIMKLA
AKR1C2
CFB
ARPC4-TTLL3
PLEK
SLC2A14
DNAAF3
HOXA3
VMO1
GSS
ALOX15B
ATP2A1
HLA-B
GPR153
PPP1R14B
CHRNA1
RASAL3
METTL27
CHI3L2
TAPBP
STAC3
TP53I13
RNF213
CD84
REP15
NINJ2
TMEM140
DUSP10
DDIT3
TSPAN4
NEU1
TUSC3
ADGRF4
SMPDL3B
ZMYND10
CGREF1
CPEB1
FCHO1
PATL2
NEFL
CD247
C16orf74
HLA-DMA
CLEC4E
XCL1
CD7
PGGHG
LEMD1
SNORC
PARP15
ADAMTSL5
TUBA1A
CMTM3
SPATS2L
FCGR2A
LTB4R
ITPRIPL1
CCNO
MDK
DRD4
KREMEN2
TIMP1
GAB3
BCO1
KIF2C
ACP5
CHTF18
SEM1
MPO
LIPC
CLEC2B
BAX
LRGUK
PRSS53
OCIAD2
SYNGR4
RPS15A
SPATA18
CARHSP1
PFN1
TBX15
DNASE2B
TRAF2
HJURP
GGTLC2
CRYAB
ETV7
IFI27L2
IL2RB
VSTM2A
HIST1H2BK
WDR62
C1QB
CTXN1
RPS19
NQO1
BLVRA
ALDH3B1
BMP1
PARVG
OVGP1
KCNK7
ASF1B
CDKN2A
HOMER3
FBXL6
ANKLE1
H2AFJ
SHC2
RPL13
PYGL
DTNA
CYP4F11
VSIG1
EMILIN2
ABR
CENPA
CALB2
ZMAT3
EME1
AJM1
TBC1D3L
ITGA3
IGF2BP3
CCDC57
CITED4
CD3E
RUNX3
ICOS
VIM
THEMIS2
RUNDC3A
SLFNL1
HGFAC
AIM2
NTN5
RAB7B
TRIM38
VWA5B2
MYO3A
OCM
LRRC25
CD244
SH3RF2
SCEL
EXOC3L4
ZNF365
NPAS2
DNTT
HIST1H2AG
LRAT
E2F7
CXorf65
NPTX2
LRRC45
BTBD19
GPR84
CCER2
TNFRSF14
EIF5AL1
CDH6
SIGLEC8
KIF18A
COLGALT1
FAM177B
AGAP2
ERCC6L
MET
CD300LF
LIMD2
SULT4A1
TNNI2
AP003419.1
AIFM3
MS4A4E
KLK14
GAPT
CDK5RAP3
RPS20
TAGAP
PHKA1
OSR1
ZNF280B
GPSM3
ENKD1
PIGZ
CDK5R1
TRIM36
FPR1
KCTD13
XKR3
PLCB2
MEIS3
FAM50A
MYBL2
IL2RA
BTBD16
MMP14
DDIAS
GZMH
LY6H
BAMBI
HPGDS
PXDN
SHOX2
EIF4EBP3
C4B
CAVIN3
TMEM253
SH2D5
PROCA1
SAMD14
MYEOV
GOLGA8B
SLA
GNLY
MC1R
AC093525.2
APOBR
TRABD2A
CXCL1
EOMES
LRRC39
VNN2
SIGLEC1
PPP1R35
BUB1
CMTM7
CNNM1
AEN
GALNS
BLM
MGAT4B
PI3
RUFY4
NDC80
CCNA2
WDR90
NCAPH
NEK2
TMEM54
ACSM1
ZBBX
TWF2
ADGRE2
SATB2
ASIP
UGT1A6
PTGFRN
ARHGAP11A
RASSF2
ADGRF2
SPP1
DCBLD2
HLA-DOB
CCDC88B
XDH
PIK3R5
NPIPB3
TCTEX1D4
SLC16A3
DBNDD1
PYCR1
CCDC167
TALDO1
PILRB
HIST1H2BJ
HSPB2
NKG7
TRIM47
ROPN1L
KDELR3
CORO7
TREML1
CD70
TMEM156
SULT1C4
PPM1N
SH2D1A
HSF4
FANCI
CLECL1
PRR7
SCNN1D
SH2D2A
HAGHL
HBQ1
BATF
KLRB1
PANO1
C12orf45
C1S
C4orf48
ENTPD2
HOXC11
WFDC5
ALDOA
NCR3
PAGE2B
VSTM1
CST7
NPIPA5
CYBB
LAG3
RGS14
RPL38
LILRA4
CSF1R
LAT
NRBP2
ADD2
HDAC10
CDC45
COL23A1
CENPI
MCU
GTF3A
DNAH2
YPEL4
ANKRD13B
NDUFAF8
TMEM178B
CD300C
C2
CYP21A2
POU5F1
APRT
HIST1H4I
DOK1
ARRDC5
FBXL8
SKA1
CELSR3
RNFT2
STAG3
KCNV1
KRT20
LPXN
LPAR5
SPSB1
CCL17
SHISA9
TSACC
CTSZ
ITGAD
VAT1
MICAL1
AMDHD2
LNP1
ARHGAP30
TNFRSF9
HILPDA
TUBB3
C17orf53
RASGEF1C
KCNN4
PCDHB9
YBX3
SRM
MAP4K1
DAGLB
RAB37
DPEP2
ARNTL2
SYT16
TNFAIP2
ERFE
AL159163.1
NCAPG
ANXA4
GRM8
VCAM1
IL4R
RETN
FUT8
SLC16A6
FTL
TLR8
C19orf33
DOK3
POLE2
ABCA12
F2
B3GALT5
ADGRE1
BIRC7
CD63
GAPDH
CD274
TMPRSS9
ARMC3
GOLGA7B
PLXNC1
MUC3A
SERPINE2
CAPG
CSF2RA
CASTOR3
HMGB3
TMEM200A
ESCO2
CDC25C
HIST1H2AE
ARL6IP5
IGFBP6
ITGAL
HRH1
CD1D
METRN
RSPO4
ALOX5AP
BBC3
SIRPA
OSM
S100A11
TLR6
ANKK1
CATIP
NLRP12
SYCE3
EEF1G
EGLN3
FBXO41
BEST4
CD44
ELOB
GPR82
HOXC13
RIN1
LILRA2
TAF10
TEDC2
PLOD2
BEAN1
MAP1LC3C
CD4
BIN2
LAIR2
NOD2
TRIM31
IQGAP3
SLC11A1
LRRC75B
CLCF1
ONECUT2
MKI67
DOK2
FAAP24
CTAGE4
LUC7L
MCEMP1
JAKMIP1
CCL3L1
SLC25A37
AC090004.1
MS4A7
EXO1
TMSB10
ZP3
AC010422.3
LINGO3
AFF2
TRAIP
CILP2
LILRB4
SGO1
MARCKS
HHLA2
STX4
ATP6V1FNB
VCAN
CCL18
PTPRH
RIMS2
DEPDC1
GPR37
RHEBL1
ALAS2
C19orf81
XKR9
CYBC1
TMEM208
PLD4
P2RX7
TMEM74B
CD1A
KMT5C
EN1
E2F2
MTCP1
CXCL8
RPL28
CLEC7A
ARHGEF39
CTSC
KRTAP1-1
